# Supplementary material for: Errors in Human-Robot Interactions and Their Effects on Robot Learning
Source: Frontiers journal article supplement (doi:10.3389/frobt.2020.558531), 2020-10-15
Supplement: Data_Sheet_1.pdf [file Data_Sheet_1.pdf]

# ***Supplementary Material:***

## **Errors in human-robot interactions and their effects on robot learning**

**Su Kyoung Kim**<sup>1,\*</sup>, **Elsa Andrea Kirchner**<sup>1,2</sup>, **Lukas Schloßmüller**<sup>2</sup>, and **Frank Kirchner**<sup>1,2</sup>

<sup>1</sup>Robotics Innovation Center, German Research Center for Artificial Intelligence (DFKI GmbH), Bremen, Germany

<sup>2</sup>Research Group Robotics, University of Bremen, Bremen, Germany

Correspondence\*:

Su Kyoung Kim

su-kyoung.kim@dfki.de

### **1 SUPPLEMENTARY FIGURES**

#### **1.1 Number of datasets for each learning condition and each subject (Tab. S1)**

Table S1. Number of datasets for each subject and each learning condition

|            | warm-start learning | cold-start learning |
|------------|---------------------|---------------------|
| 2 subjects | 3 datasets          | 3 datasets          |
| 2 subjects | 3 datasets          | 2 datasets          |
| 3 subjects | 2 datasets          | 2 datasets          |
| 1 subject  | 2 datasets          | 1 dataset           |
| total      | 20 datasets         | 17 datasets         |

#### **1.2 A descriptive visualization of correlation between robot's learning performance (mapping errors) and ErrP-detection performance (FN, FP, TP, TN) for both perspectives (Fig. S1)**

#### **1.3 A descriptive visualization of correlation between ErrP-detection performance (FN, FP, TP, TN) and gesture errors for both perspectives (Fig. S2)**

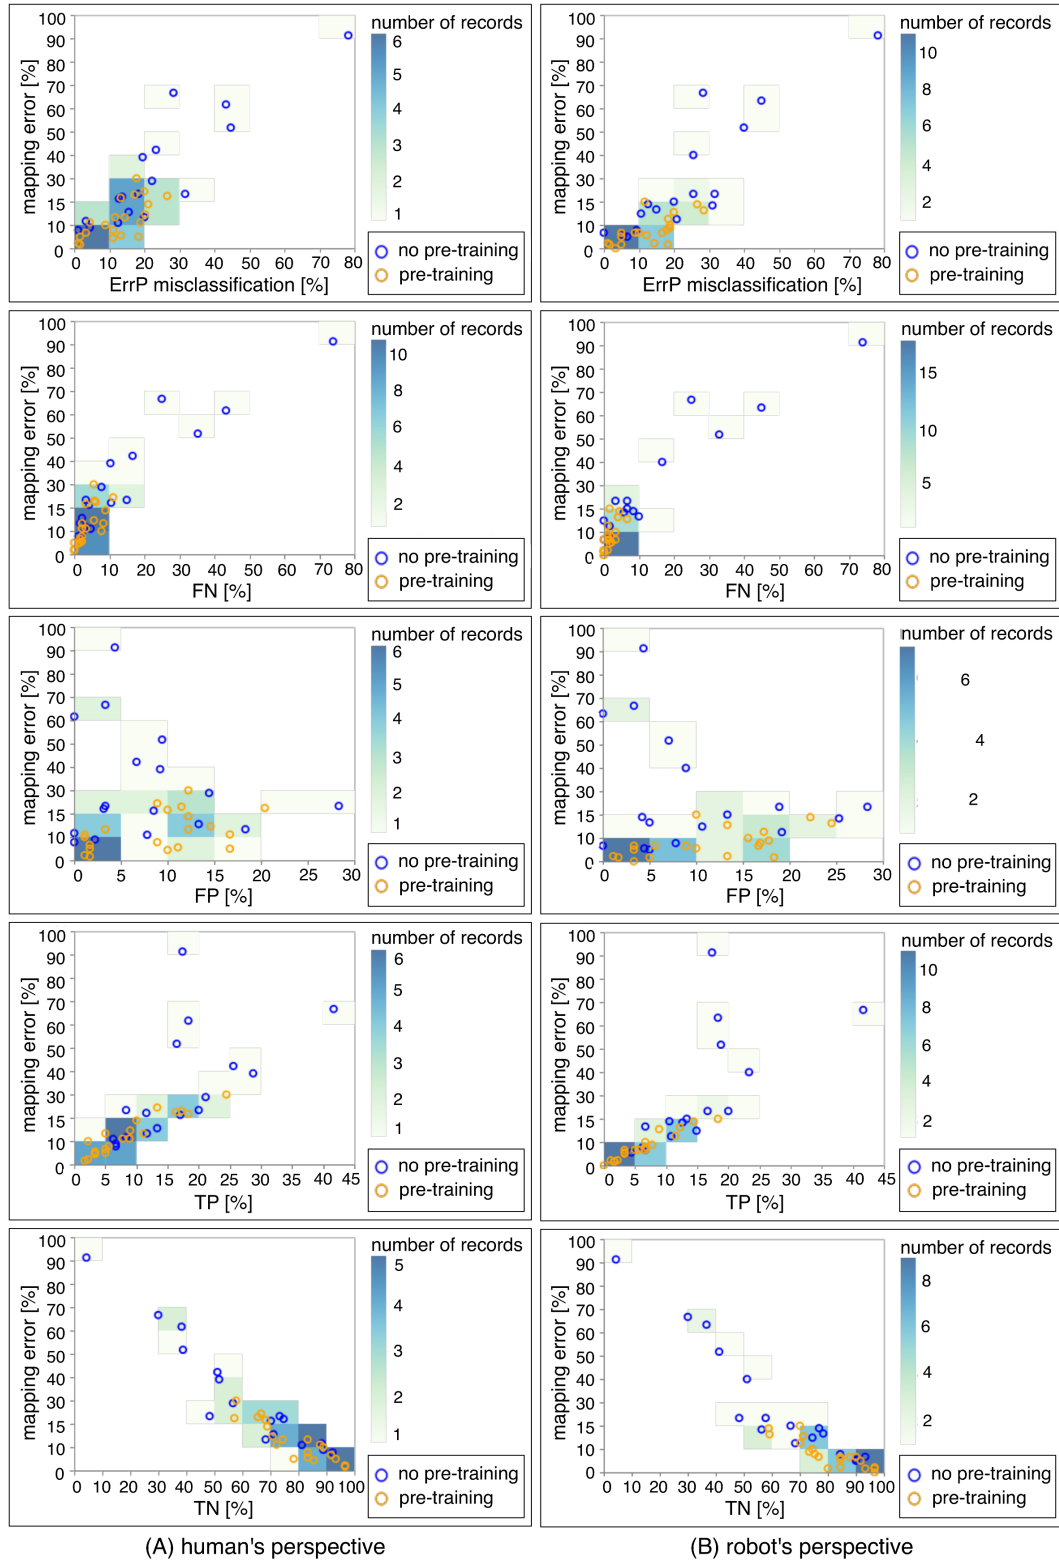

**Figure S1.** A descriptive visualization of correlation between mapping errors and ErrP-detection performance (FN, FP, TP, TN) for both perspectives: (A) human's perspective and (B) robot's perspective. For each perspective, the comparison between both learning conditions is depicted in different colors: pre-training (yellow) vs. no pre-training (blue). Each dot represents each dataset (details, see text).

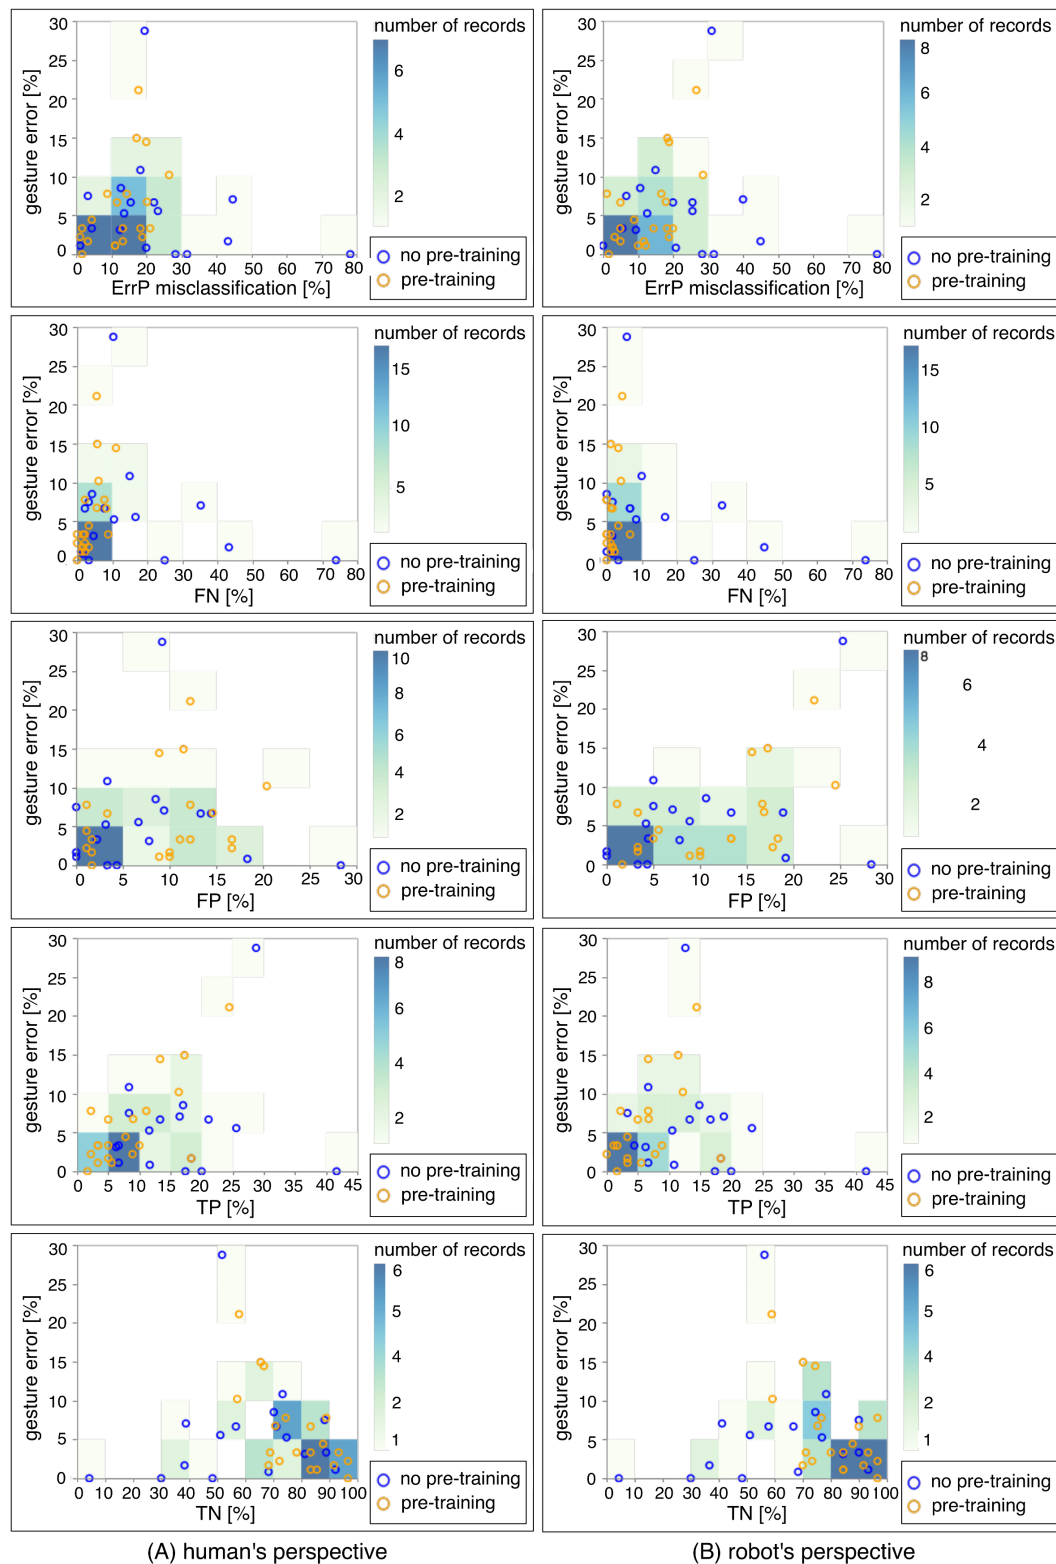

**Figure S2.** A descriptive visualization of correlation between gesture errors and ErrP-detection performance (FN, FP, TP, TN) for both perspectives: (A) human's perspective and (B) robot's perspective. For each perspective, the comparison between both learning conditions is depicted in different colors: pre-training (yellow) vs. no pre-training (blue). Each dot represents each dataset (details, see text).
